# Supplementary material for: All-Trans Retinoic Acid Prevents Osteosarcoma Metastasis by Inhibiting M2 Polarization of Tumor-Associated Macrophages
Source: Oxford University Press journal article supplement (doi:10.1158/2326-6066.cir-16-0259), 2017-05-17
Supplement: 23266066cir160259-sup-172390_3_supp_4029696_9pqk9c.xlsx [file 23266066cir160259-sup-172390_3_supp_4029696_9pqk9c.xlsx]

## Sheet: Sheet1
TABLE S2. Functional annotation clustering of overlapped 324 genes listed according to their enrichment scores by DAVID
Cluster	Count	Enrichment Score	P_Value
Secreted	89	8.29	1.2e-05
Vasculature development	26	3.98	1.7e-05
Regulation of apoptosis	36	2.02	0.0036
Inflammatory response	16	1.84	0.032
Cell adhesion	27	1.75	0.0046
Cell junction	31	1.59	0.0075
Cell migration	16	1.28	0.049
Cell motion	22	1.28	0.053
Collagen degradation	4	1.01	0.023
